# Supplementary material for: Genome-wide identification of the SWEET gene family mediating the cold stress response in Prunus mume
Source: PeerJ journal article supplement (doi:10.7717/peerj.13273), 2022-05-03
Supplement: Supplementary_Figure_1.pdf [file Supplementary_Figure_1.pdf]

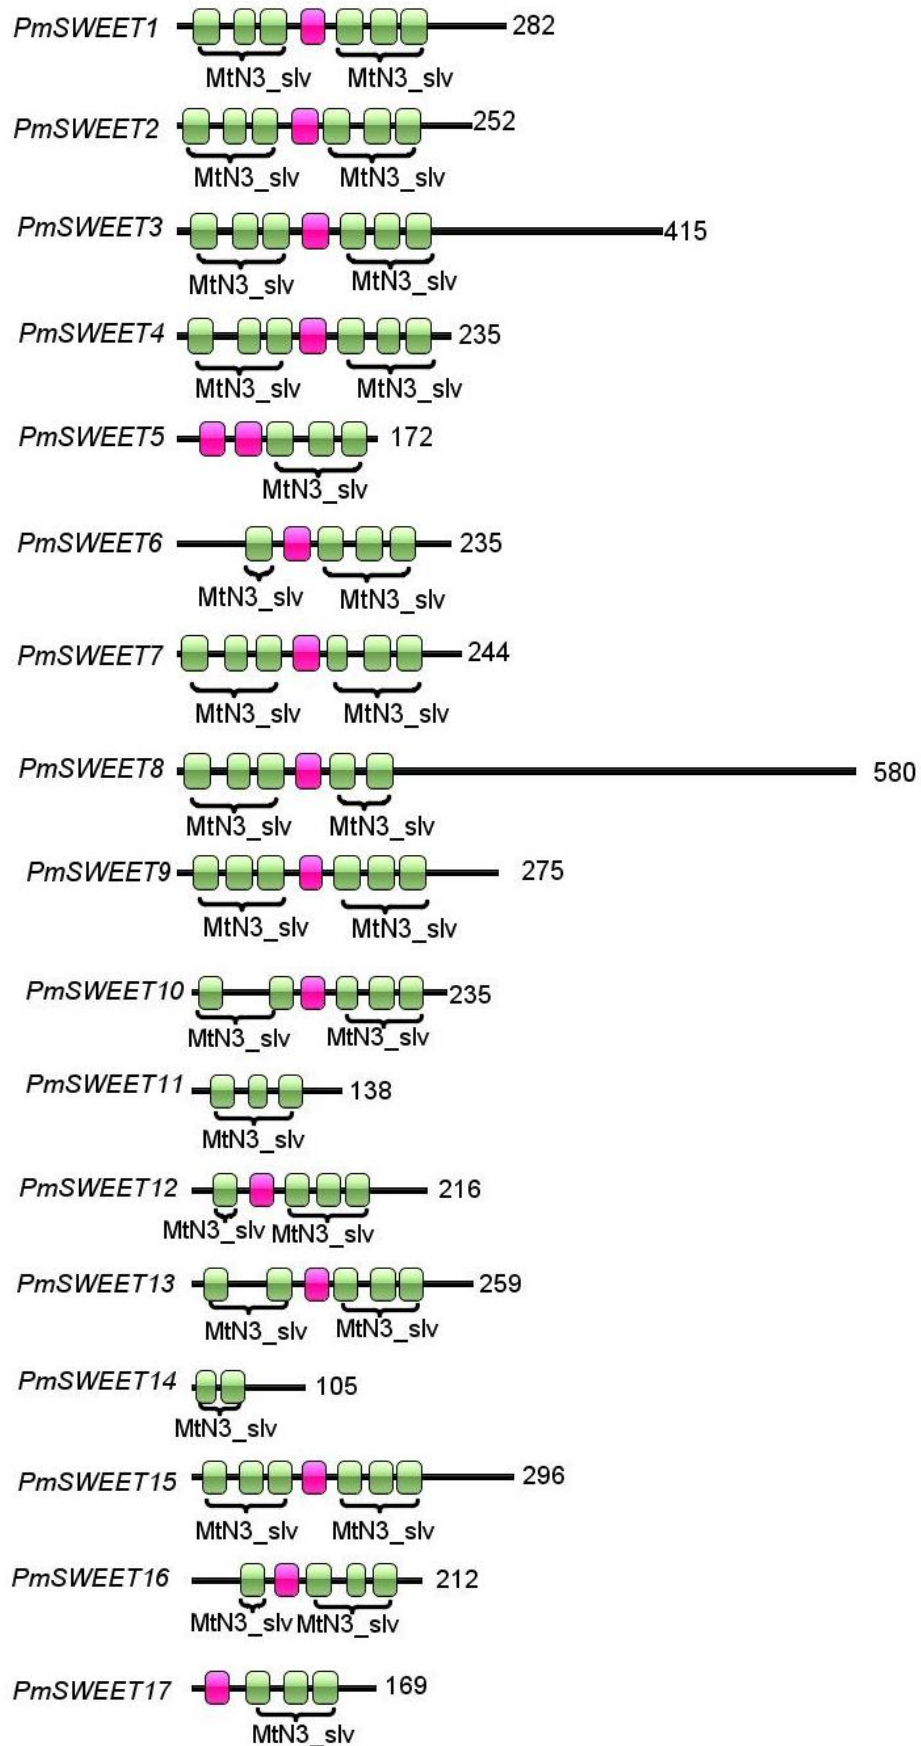

Supplementary Figure 1. Schematic representation of *PmSWEET* proteins. Colored boxes indicate TMs. The IBS1.0 software was used to drawing diagram (Liu et al., 2015).

Liu, W., Xie, Y., Ma, J., Luo X., Nie, P., Zuo, Z., et al. (2015). IBS: an illustrator for the presentation and visualization of biological sequences. *Bioinformatics*. 31(20): 3359-3361.
