# Supplementary material for: Genome-wide identification of the SWEET gene family mediating the cold stress response in Prunus mume
Source: PeerJ journal article supplement (doi:10.7717/peerj.13273), 2022-05-03
Supplement: Supplementary_Figure_3.pdf [file Supplementary_Figure_3.pdf]

Motif1

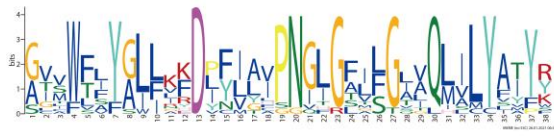

Motif2

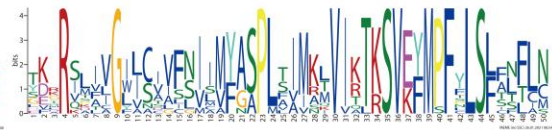

Motif3

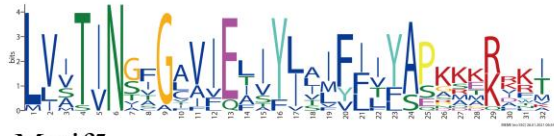

Motif4

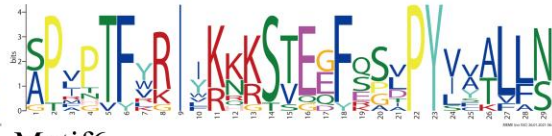

Motif5

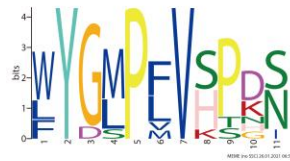

Motif6

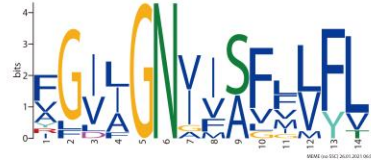

Motif7

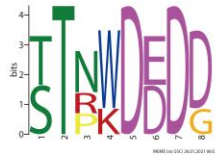

Motif8

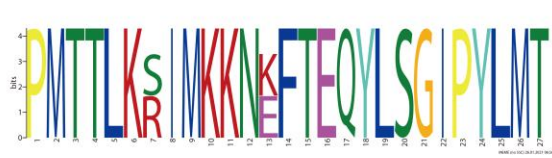

Motif9

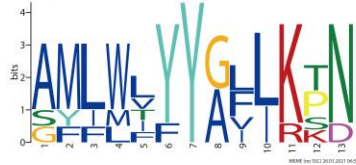

Motif10

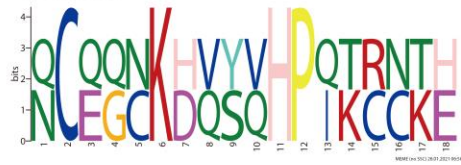

Supplementary Figure 3. Schematic diagram of *Pm*SWEET protein motifs. The bit score is proportional to the frequency of the corresponding amino acid at each position.
